# Supplementary material for: Stability Improvement of Perovskite Solar Cells by the Moisture-Resistant PMMA:Spiro-OMeTAD Hole Transport Layer
Source: MDPI journal article supplement (doi:10.3390/polym14020343), 2022-01-17
Supplement: s1 [file s1]

## Support Information

Article

# Stability Improvement of Perovskite Solar Cells by the Moisture-Resistant PMMA:Spiro-OMeTAD Hole Transport Layer

Shaohua Ma <sup>1,†</sup>, Shangzheng Pang <sup>2,†</sup>, Hang Dong <sup>2</sup>, Xiaoping Xie <sup>3</sup>, Gang Liu <sup>3</sup>, Peng Dong <sup>3</sup>, Dawei Liu <sup>3</sup>, Weidong Zhu <sup>2</sup>, He Xi <sup>2</sup>, Dazheng Chen <sup>2,\*</sup>, Chunfu Zhang <sup>2,\*</sup> and Yue Hao <sup>2</sup>

<sup>1</sup> Key Laboratory of Micro/Nano Systems for Aerospace, Ministry of Education, Northwestern Polytechnical University, Xi'an 710072, China; mashaohua@spic.com.cn

<sup>2</sup> Wide Bandgap Semiconductor Technology Disciplines State Key Laboratory, Shaanxi Joint Key Laboratory of Graphene, School of Microelectronics, Xidian University, Xi'an 710071, China; szpang@stu.xidian.edu.cn (S.P.); donghangxd@163.com (H.D.); wdzhu@xidian.edu.cn (W.Z.); hxi@xidian.edu.cn (H.X.); yhao@xidian.edu.cn (Y.H.)

<sup>3</sup> Qinghai Huanghe Hydropower Development Co., Ltd., Xining 810008, China; xiexiaoping@spic.com.cn (X.X.); liugang@spic.com.cn (G.L.); dongpeng@spic.com.cn (P.D.); liudawei02@spic.com.cn (D.L.)

\* Correspondence: dzchen@xidian.edu.cn (D.C.); cfzhang@xidian.edu.cn (C.Z.)

† These authors contributed equally to this work.

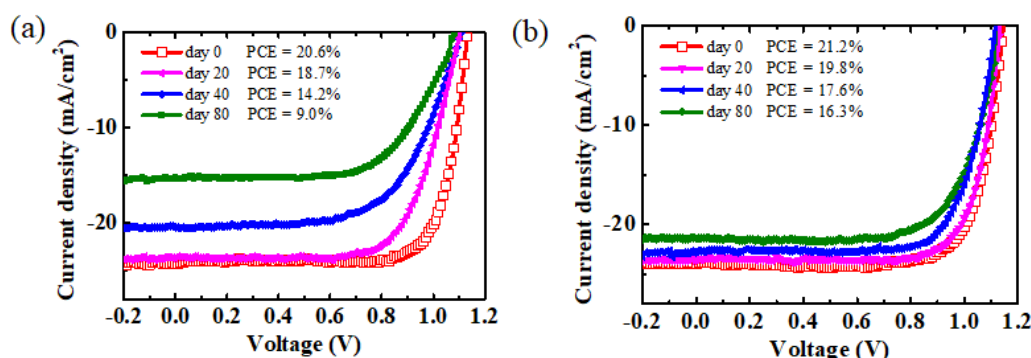

**Figure S1.** J/V curves of PSCs stored for a long time of (a) pure spiro-OMeTAD and (b) PMMA (2 mg/mL): spiro-OMeTAD based cells kept in the air atmosphere at RH = 40% for 80 days.

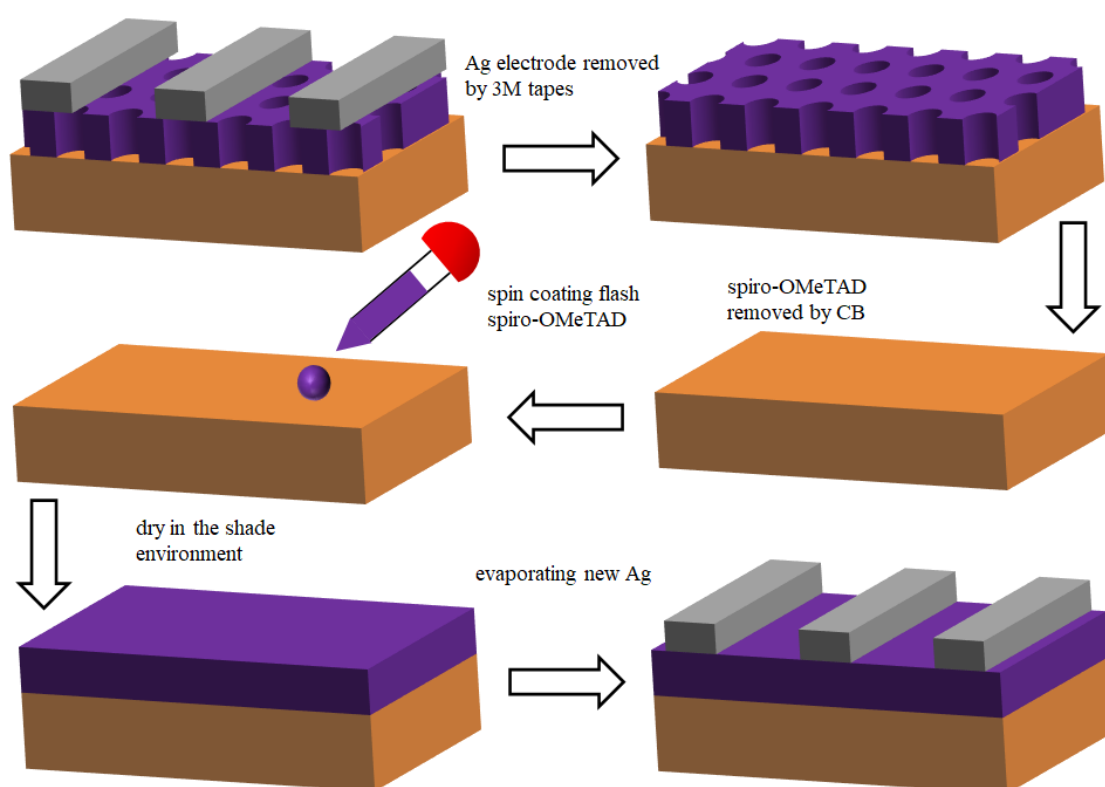

**Figure S2.** The procedures of renovating long-term stored PSCs. The gray layer represents the Ag electrode, the purple layer represents the spiro-OMeTAD and the orange layer represents perovskite and other support layers.
